# Supplementary material for: An investigation into the magnetic interactions in a series of Dy2single-molecule magnets
Source: Royal Society of Chemistry journal article supplement (doi:10.1039/d0dt01926g), 2020-01-01
Supplement: d0dt01926g1.pdf [file d0dt01926g1.pdf]

## Supporting Information

### **An investigation into the magnetic interactions in a series of Dy<sub>2</sub> single-molecule magnets**

Chaoyi Jin,<sup>a, b</sup> Xiao-Lei Li,<sup>a</sup> Zhiliang Liu,<sup>b</sup> Akseli Mansikkamäki,<sup>\*c</sup> and Jinkui Tang<sup>\*a, d</sup>

<sup>a</sup>State Key Laboratory of Rare Earth Resource Utilization, Changchun Institute of Applied Chemistry, Chinese Academy of Sciences, Changchun 130022, P. R. China

<sup>b</sup>College of Chemistry and Chemical Engineering, Inner Mongolia University, Hohhot 010021, China

<sup>c</sup>NMR Research Unit, University of Oulu, P.O. Box 8000, Finland

<sup>d</sup>School of Applied Chemistry and Engineering, University of Science and Technology of China, Hefei, 230026, P. R. China

#### **Corresponding Authors**

\*E-mail: Akseli.Mansikkamaki@oulu.fi

\*E-mail: tang@ciac.ac.cn

Table S1. Crystallographic data and structure refinement details of complexes **1**, **2** and **3**.

|                                                                              | <b>1</b>                                                                                         | <b>2</b>                                                                         | <b>3</b>                                                                                       |
|------------------------------------------------------------------------------|--------------------------------------------------------------------------------------------------|----------------------------------------------------------------------------------|------------------------------------------------------------------------------------------------|
| empirical formula                                                            | C <sub>49</sub> H <sub>65</sub> ClDy <sub>2</sub> F <sub>3</sub> N <sub>11</sub> O <sub>15</sub> | C <sub>41</sub> H <sub>51</sub> Dy <sub>2</sub> N <sub>9</sub> O <sub>12</sub> S | C <sub>41</sub> H <sub>56</sub> Cl <sub>2</sub> Dy <sub>2</sub> N <sub>8</sub> O <sub>13</sub> |
| Formula Weight                                                               | 1465.57                                                                                          | 1218.97                                                                          | 1264.83                                                                                        |
| Temperature/K                                                                | 173                                                                                              | 173                                                                              | 173                                                                                            |
| Crystal system                                                               | monoclinic                                                                                       | monoclinic                                                                       | monoclinic                                                                                     |
| Space group                                                                  | P2 <sub>1</sub> /c                                                                               | P2 <sub>1</sub> /c                                                               | P2 <sub>1</sub> /c                                                                             |
| <i>a</i> /Å                                                                  | 17.6969(6)                                                                                       | 14.5797(6)                                                                       | 10.7089(4)                                                                                     |
| <i>b</i> /Å                                                                  | 15.0291(5)                                                                                       | 21.9434(9)                                                                       | 28.6894(12)                                                                                    |
| <i>c</i> /Å                                                                  | 22.5627(7)                                                                                       | 15.8475(7)                                                                       | 15.6149(6)                                                                                     |
| <i>α</i> /°                                                                  | 90                                                                                               | 90                                                                               | 90                                                                                             |
| <i>β</i> /°                                                                  | 112.191(2)                                                                                       | 116.407(2)                                                                       | 105.994(2)                                                                                     |
| <i>γ</i> /°                                                                  | 90                                                                                               | 90                                                                               | 90                                                                                             |
| Volume/Å <sup>3</sup>                                                        | 5556.5(3)                                                                                        | 4541.0(3)                                                                        | 4611.7(3)                                                                                      |
| <i>Z</i>                                                                     | 4                                                                                                | 4                                                                                | 4                                                                                              |
| $\rho_{\text{calc}}/\text{cm}^3$                                             | 1.752                                                                                            | 1.783                                                                            | 1.822                                                                                          |
| $\mu/\text{mm}^{-1}$                                                         | 15.409                                                                                           | 18.436                                                                           | 18.816                                                                                         |
| reflns collected                                                             | 32439                                                                                            | 27644                                                                            | 30217                                                                                          |
| <i>R</i> <sub>int</sub>                                                      | 0.0627                                                                                           | 0.0462                                                                           | 0.0461                                                                                         |
| GOF on F <sup>2</sup>                                                        | 1.029                                                                                            | 1.029                                                                            | 1.048                                                                                          |
| * <i>R</i> <sub>1</sub> , <i>wR</i> <sub>2</sub> [ <i>I</i> ≥2σ( <i>I</i> )] | 0.0442, 0.1088                                                                                   | 0.0323, 0.0755                                                                   | 0.0359, 0.0895                                                                                 |
| * <i>R</i> <sub>1</sub> , <i>wR</i> <sub>2</sub> [all data]                  | 0.0544, 0.1176                                                                                   | 0.0415, 0.0804                                                                   | 0.0454, 0.0947                                                                                 |

\* $R_1 = \sum ||F_o| - |F_c|| / \sum |F_o|$  for  $F_o > 2\sigma(F_o)$ ;  $wR_2 = (\sum w(F_o^2 - F_c^2)^2 / \sum (wF_c^2)^2)^{1/2}$  all reflections,  $w = 1 / [\sigma^2(F_o^2) + (0.1557P)^2]$  where  $P = (F_o^2 + 2F_c^2) / 3$

Table S2. Selected bond distances [Å] for complexes **1**, **2**, and **3**.

|         | <b>1</b> | <b>2</b>        | <b>3</b>           |
|---------|----------|-----------------|--------------------|
| Dy1-O1  | 2.527(4) | Dy1-O2 2.353(3) | Dy1-O1 2.199(4)    |
| Dy1-O2  | 2.342(4) | Dy1-O3 2.346(3) | Dy1-O2 2.515(4)    |
| Dy1-O3  | 2.194(4) | Dy1-O4 2.471(3) | Dy1-O3 2.489(4)    |
| Dy1-O4  | 2.455(4) | Dy1-O5 2.223(3) | Dy1-O4 2.351(4)    |
| Dy1-O7  | 2.415(4) | Dy1-O9 2.468(3) | Dy1-O5 2.476(4)    |
| Dy1-O10 | 2.460(4) | Dy1-N1 2.491(4) | Dy1-O7 2.432(4)    |
| Dy1-N1  | 2.509(5) | Dy1-N3 2.501(4) | Dy1-N2 2.500(4)    |
| Dy1-N3  | 2.691(5) | Dy1-N8 2.633(4) | Dy1-N4 2.685(5)    |
| Dy1-N5  | 2.545(5) | Dy1-N9 2.543(4) | Dy1-N5 2.528(5)    |
| Dy2-O1  | 2.324(4) | Dy2-O1 2.338(3) | Dy2-Cl1 2.7644(16) |
| Dy2-O2  | 2.520(4) | Dy2-O3 2.540(3) | Dy2-O2 2.342(4)    |
| Dy2-O5  | 2.183(4) | Dy2-O4 2.356(3) | Dy2-O4 2.558(4)    |
| Dy2-O6  | 2.427(4) | Dy2-O6 2.247(3) | Dy2-O6 2.472(4)    |
| Dy2-O8  | 2.456(4) | Dy2-O7 2.526(3) | Dy2-O8 2.212(4)    |
| Dy2-O11 | 2.409(4) | Dy2-O8 2.463(3) | Dy2-O10 2.444(4)   |
| Dy2-N6  | 2.502(5) | Dy2-N2 2.532(4) | Dy2-N1 2.525(5)    |
| Dy2-N7  | 2.697(5) | Dy2-N5 2.576(4) | Dy2-N6 2.474(5)    |
| Dy2-N8  | 2.502(5) | Dy2-N7 2.633(4) | Dy2-N7 2.652(5)    |

Table S3. Accurate geometry analysis by SHAPE 2.0 software.

| complex | <b>1</b> | <b>2</b> | <b>3</b> |
|---------|----------|----------|----------|
| Dy1     | 1.427    | 1.428    | 1.740    |
| Dy2     | 1.373    | 2.041    | 1.861    |

Table S4. Characteristic dynamic parameters for **1**, **2** and **3**.

|                                      | <b>1</b>              | <b>2</b> FR           | <b>2</b> SR           | <b>3</b>              |
|--------------------------------------|-----------------------|-----------------------|-----------------------|-----------------------|
| $U_{\text{eff}}/K$                   | 90.57                 | 72.03                 | 54.02                 | 81.39                 |
| $\tau_0$ (Orbach)                    | $3.01 \times 10^{-7}$ | $1.19 \times 10^{-8}$ | $3.06 \times 10^{-6}$ | $9.18 \times 10^{-8}$ |
| $U_{\text{eff}}/K$                   | 87.25                 | 78.81                 | 53.41                 | 81.39                 |
| $\tau_0$ (fit)                       | $2.48 \times 10^{-7}$ | $5.38 \times 10^{-9}$ | $3.75 \times 10^{-6}$ | $1.91 \times 10^{-7}$ |
| $C$ ( $\text{s}^{-1}\text{K}^{-n}$ ) | 2.59                  | 11.72                 | 5.05                  | 5.05                  |
| $n$                                  | 1.72                  | 1.52                  | 1.07                  | 1.07                  |
| $\alpha$                             | 0.03-0.23             | 0.17-0.19             | < 0.08                | 0.08-0.2              |
| $\tau$ (1.9–10 K)                    | 0.001–<br>0.11        | $10^{-5}$ –0.027      | 0.001–0.094           | $10^{-4}$ –0.07       |

Table S5. Properties of the eight lowest Kramers doublets (KDs) of each Dy<sup>III</sup> ion in **1**.

|      | Dy1                |                |                |                |                | Dy2                |                |                |                |                |
|------|--------------------|----------------|----------------|----------------|----------------|--------------------|----------------|----------------|----------------|----------------|
|      | E/cm <sup>-1</sup> | g <sub>x</sub> | g <sub>y</sub> | g <sub>z</sub> | θ <sub>a</sub> | E/cm <sup>-1</sup> | g <sub>x</sub> | g <sub>y</sub> | g <sub>z</sub> | θ <sub>a</sub> |
| KD 1 | 0                  | 0.0302         | 0.0643         | 19.6051        | 0.0°           | 0                  | 0.0257         | 0.0549         | 19.5943        | 0.0°           |
| KD 2 | 147                | 1.1035         | 3.1208         | 14.4679        | 7.6°           | 136                | 1.1345         | 2.5965         | 15.2341        | 8.2°           |
| KD 3 | 200                | 0.7856         | 2.4868         | 12.1192        | 138.3°         | 190                | 0.7057         | 3.2518         | 13.1546        | 57.4°          |
| KD 4 | 283                | 1.3508         | 1.6048         | 11.9522        | 21.2°          | 254                | 0.8310         | 4.2267         | 10.6270        | 154.8°         |
| KD 5 | 351                | 3.9066         | 5.7331         | 10.3442        | 46.1°          | 316                | 3.1668         | 4.2837         | 11.8896        | 128.1°         |
| KD 6 | 385                | 1.6824         | 2.7985         | 15.9031        | 92.5°          | 358                | 8.5726         | 6.4501         | 1.4961         | 40.4°          |
| KD 7 | 419                | 0.4226         | 0.8814         | 16.6808        | 99.9°          | 375                | 2.0992         | 5.5468         | 14.1902        | 95.6°          |
| KD 8 | 562                | 0.0163         | 0.0394         | 19.6694        | 104.5°         | 498                | 0.0309         | 0.0496         | 19.5169        | 74.3°          |

<sup>a</sup> The angle between the principal magnetic axis of the doublet and that of the ground doublet.

Table S6. Properties of the eight lowest Kramers doublets (KDs) of each Dy<sup>III</sup> ion in **2**.

|      | Dy1                |                |                |                |                | Dy2                |                |                |                |                |
|------|--------------------|----------------|----------------|----------------|----------------|--------------------|----------------|----------------|----------------|----------------|
|      | E/cm <sup>-1</sup> | g <sub>x</sub> | g <sub>y</sub> | g <sub>z</sub> | θ <sub>a</sub> | E/cm <sup>-1</sup> | g <sub>x</sub> | g <sub>y</sub> | g <sub>z</sub> | θ <sub>a</sub> |
| KD 1 | 0                  | 0.0455         | 0.0662         | 19.4346        | 0.0°           | 0                  | 0.3067         | 1.1655         | 17.3799        | 0.0°           |
| KD 2 | 110                | 1.0438         | 2.0482         | 15.3855        | 7.4°           | 69                 | 0.4876         | 1.0211         | 13.5709        | 18.8°          |
| KD 3 | 166                | 1.6525         | 3.6387         | 12.2049        | 120.7°         | 109                | 0.2929         | 0.5279         | 17.7239        | 36.6°          |
| KD 4 | 224                | 8.3467         | 6.8996         | 0.6906         | 97.1°          | 141                | 3.3107         | 5.7153         | 9.3171         | 124.7°         |
| KD 5 | 280                | 9.8743         | 5.9968         | 1.5192         | 153.9°         | 202                | 2.5843         | 4.0092         | 10.5912        | 73.0°          |
| KD 6 | 318                | 3.2537         | 5.6318         | 10.7723        | 103.8°         | 289                | 0.1876         | 0.5357         | 16.3934        | 56.1°          |
| KD 7 | 373                | 1.2474         | 2.0281         | 15.6755        | 92.3°          | 348                | 0.2179         | 0.2705         | 17.5037        | 94.5°          |
| KD 8 | 485                | 0.0215         | 0.0594         | 19.4335        | 79.6°          | 477                | 0.0225         | 0.0532         | 19.1894        | 91.9°          |

<sup>a</sup> The angle between the principal magnetic axis of the doublet and that of the ground doublet.

Table S7. Properties of the eight lowest Kramers doublets (KDs) of each Dy<sup>III</sup> ion in **3**.

|      | Dy1                |                |                |                |                | Dy2                |                |                |                |                |
|------|--------------------|----------------|----------------|----------------|----------------|--------------------|----------------|----------------|----------------|----------------|
|      | E/cm <sup>-1</sup> | g <sub>x</sub> | g <sub>y</sub> | g <sub>z</sub> | θ <sub>a</sub> | E/cm <sup>-1</sup> | g <sub>x</sub> | g <sub>y</sub> | g <sub>z</sub> | θ <sub>a</sub> |
| KD 1 | 0                  | 0.0305         | 0.0612         | 19.6699        | 0.0°           | 0                  | 0.0259         | 0.0625         | 19.5576        | 0.0°           |
| KD 2 | 148                | 1.0409         | 3.2962         | 14.2075        | 20.3°          | 131                | 0.9223         | 1.9579         | 15.8873        | 18.8°          |
| KD 3 | 201                | 1.4058         | 2.1405         | 10.8921        | 11.0°          | 197                | 1.3266         | 2.8546         | 13.1811        | 120.6°         |
| KD 4 | 288                | 0.7102         | 3.1154         | 11.6462        | 23.1°          | 258                | 0.9756         | 4.0923         | 10.1631        | 18.6°          |
| KD 5 | 366                | 8.5943         | 7.7417         | 4.1465         | 43.5°          | 325                | 9.1623         | 8.8510         | 3.2952         | 141.1°         |
| KD 6 | 427                | 1.4938         | 2.3520         | 14.1464        | 98.4°          | 372                | 1.3433         | 4.9926         | 11.9116        | 83.4°          |
| KD 7 | 460                | 0.0422         | 0.1539         | 18.0354        | 85.3°          | 401                | 1.9423         | 5.8174         | 12.6832        | 108.2°         |
| KD 8 | 568                | 0.0260         | 0.0618         | 19.5884        | 78.1°          | 482                | 0.1364         | 0.4062         | 19.1253        | 76.8°          |

<sup>a</sup> The angle between the principal magnetic axis of the doublet and that of the ground doublet.

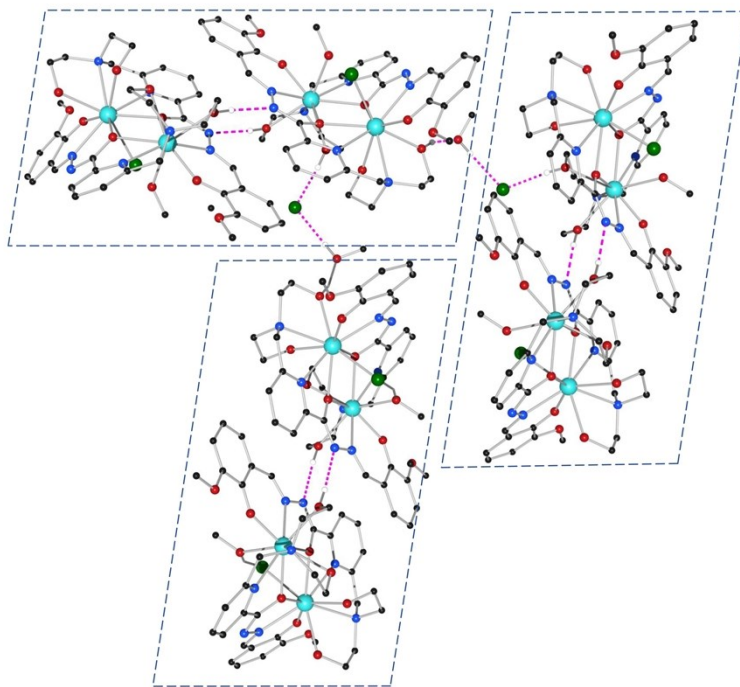

Fig. S1. Multiple intermolecular hydrogen bondings (pink line) in **3**.

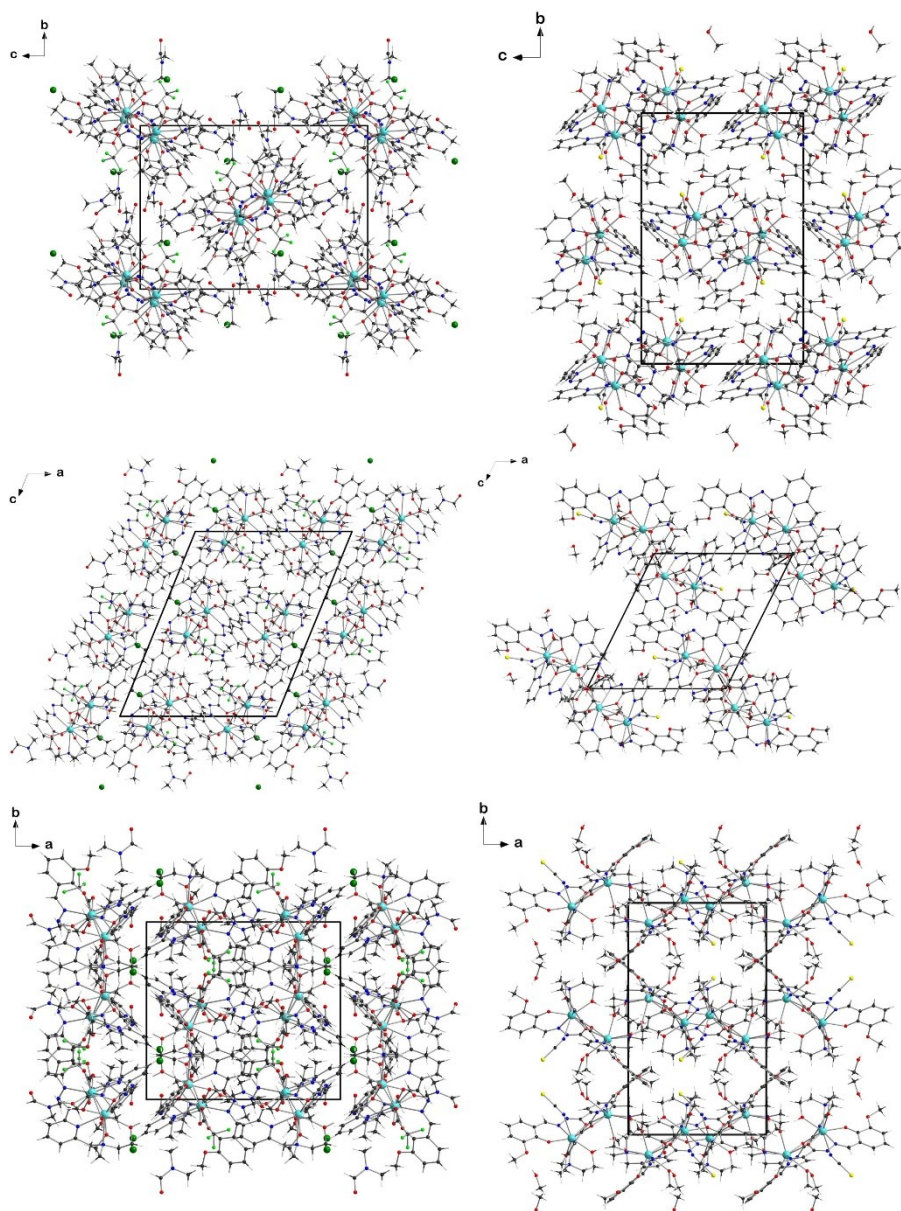

Fig. S2. Packing arrangement along the crystallographic a (top), b (middle), and c-axis (bottom) for complexes **1** (left) and **2** (right). Color code: turquoise, Dy; blue, N; red, O; bright green, F; green, Cl; yellow, S; gray, C; white (wires / sticks), H.

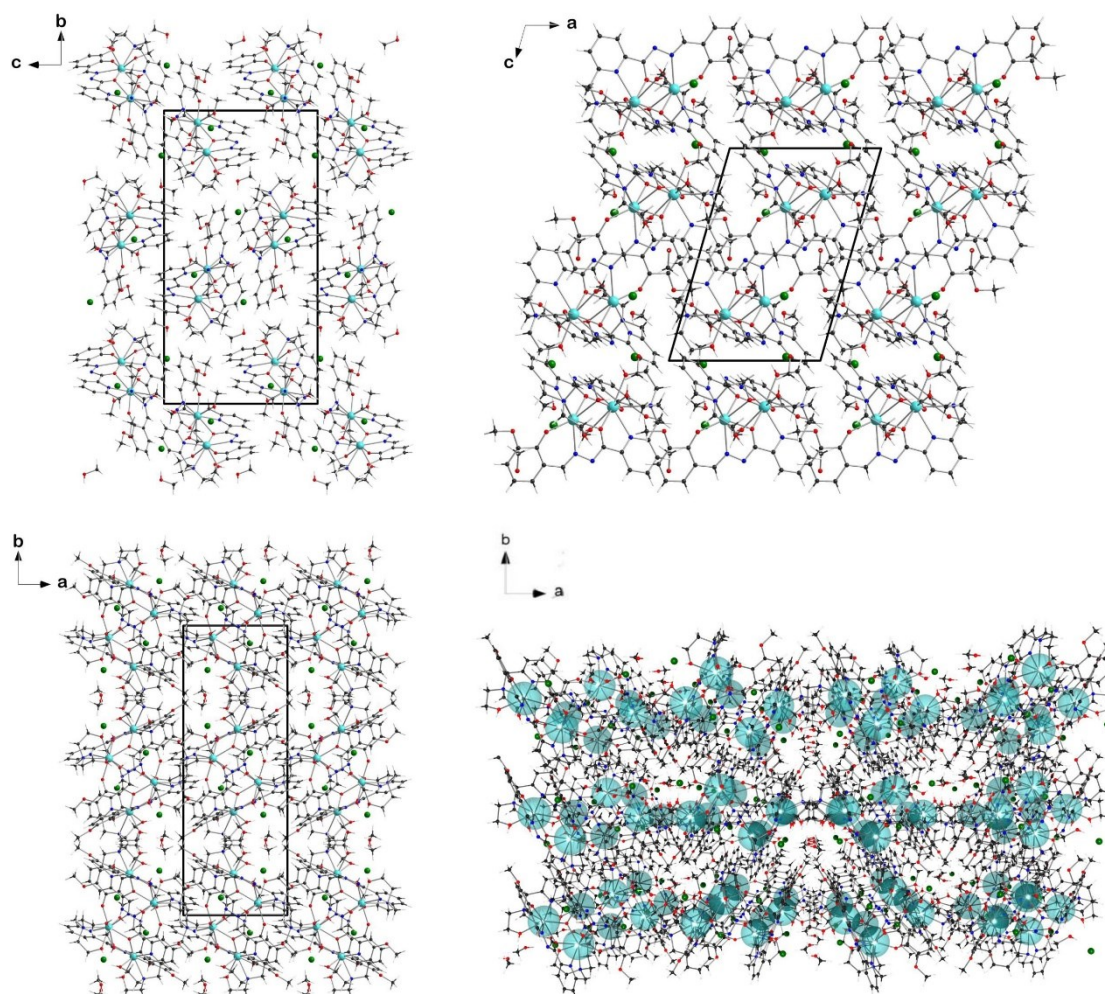

Fig. S3. Packing arrangement along the crystallographic a (top right), b (top left), and c-axis (bottom left in normal style and bottom right in central projection style) for complexes **3**. Color code: turquoise, Dy; blue, N; red, O; bright green, F; green, Cl; gray, C; white (wires / sticks), H.

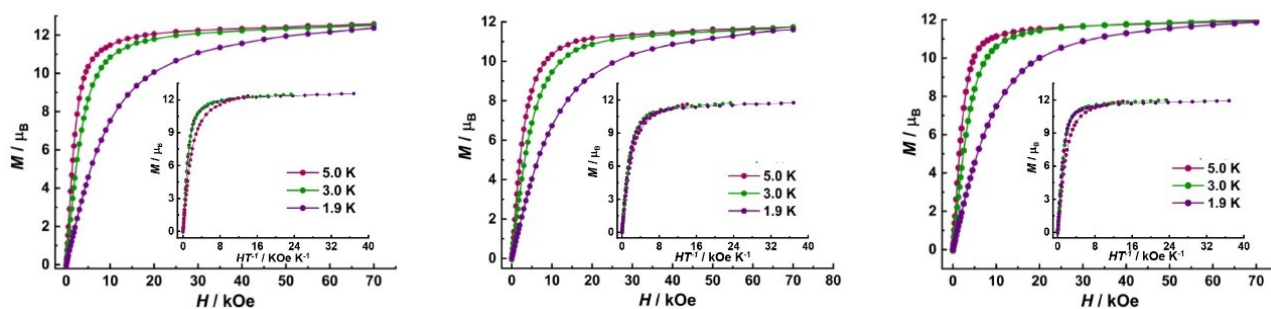

Fig. S4. Field dependences of magnetization in the field range 0–70 kOe and at the temperature range of 1.9–5.0 K. Insets: Plots of the reduced magnetization  $M$  vs.  $H/T$  for complexes **1** (left), **2** (middle), **3** (right). The solid lines are just guides for the eye.

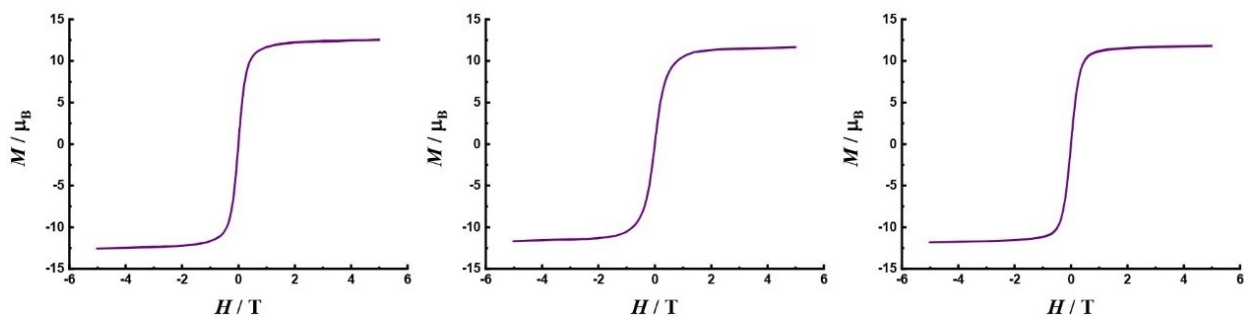

Fig. S5. Magnetization plots of complexes 1–3 show no observable hysteresis at 1.9 K.

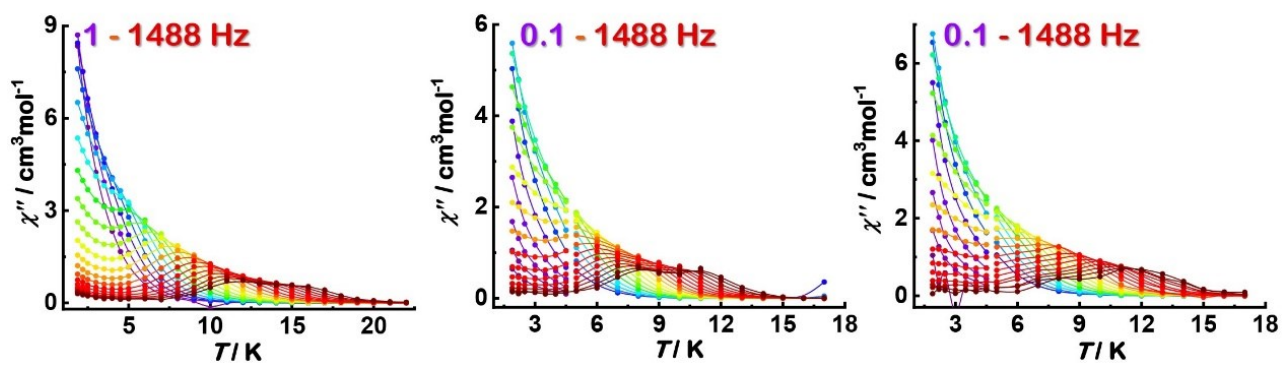

Fig. S6. Temperature dependence of the out-of-phase ac susceptibilities under zero dc field for three complexes (1–3 from left to right).

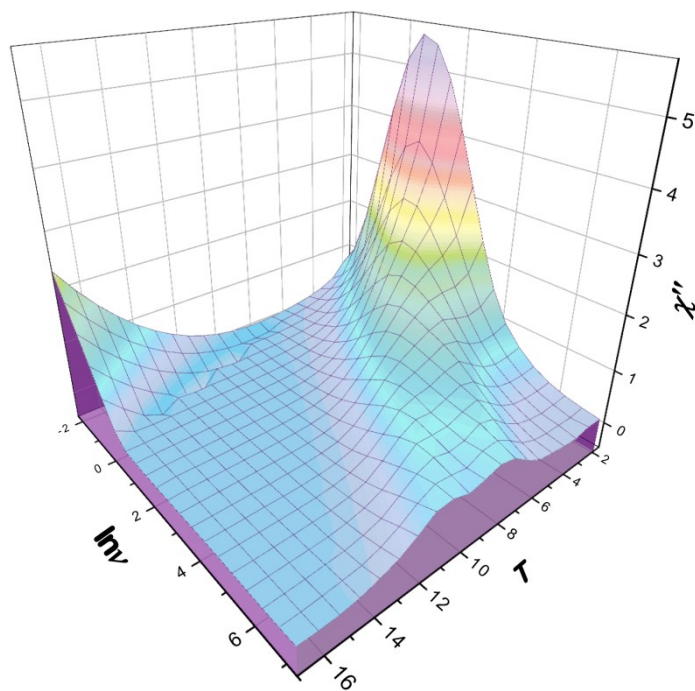

Fig. S7. 3D graph of  $\chi''$  vs. frequency  $\nu$  in logarithmic scale in the temperature range 1.9–17 K for 2.



## Additional computational data for the supporting information

Table S8. The ab initio CF parameters for the two Dy<sup>III</sup> ions in **1** given in Iwahara-Chibotaru notation.<sup>1, 2</sup>

| k  | q <sup>a</sup> | Dy1         |            |            | Dy2         |            |            |
|----|----------------|-------------|------------|------------|-------------|------------|------------|
|    |                | Re(Bkq)     | Im(Bkq)    | Bkq        | Re(Bkq)     | Im(Bkq)    | Bkq        |
| 2  | 0              | -227.527436 | 0.000000   | 227.527436 | -205.934140 | 0.000000   | 205.934140 |
| 2  | 1              | 37.943018   | 1.297149   | 37.965184  | -30.114491  | -6.432165  | 30.793754  |
| 2  | 2              | 95.856761   | 24.053742  | 98.828646  | 71.211407   | 14.380530  | 72.648910  |
| 4  | 0              | -52.620590  | 0.000000   | 52.620590  | -48.882603  | 0.000000   | 48.882603  |
| 4  | 1              | -21.338139  | 6.684112   | 22.360535  | 19.460838   | -2.548276  | 19.626970  |
| 4  | 2              | 9.677035    | 1.557041   | 9.801499   | 8.224756    | 6.873201   | 10.718559  |
| 4  | 3              | 7.311721    | 21.379531  | 22.595256  | -8.511394   | -23.357174 | 24.859634  |
| 4  | 4              | -14.626035  | 28.553557  | 32.081560  | -9.402747   | 26.655346  | 28.265157  |
| 6  | 0              | -3.748779   | 0.000000   | 3.748779   | -1.140073   | 0.000000   | 1.140073   |
| 6  | 1              | -2.571494   | -8.606822  | 8.982759   | 2.976646    | 7.656332   | 8.214611   |
| 6  | 2              | -3.897546   | 5.871811   | 7.047626   | 0.478664    | 2.003315   | 2.059707   |
| 6  | 3              | -3.888340   | -20.800298 | 21.160614  | 8.585159    | 21.695533  | 23.332405  |
| 6  | 4              | -8.861874   | 9.713114   | 13.148285  | 0.538819    | 9.573391   | 9.588542   |
| 6  | 5              | -10.224231  | -11.699037 | 15.537129  | 14.314347   | 10.961486  | 18.029274  |
| 6  | 6              | 4.185059    | 11.745306  | 12.468638  | 9.295960    | 11.332696  | 14.657587  |
| 8  | 0              | -0.111543   | 0.000000   | 0.111543   | -0.137407   | 0.000000   | 0.137407   |
| 8  | 1              | 0.108400    | 0.029944   | 0.112459   | -0.104400   | -0.011873  | 0.105073   |
| 8  | 2              | -0.044884   | 0.106618   | 0.115681   | -0.048114   | 0.108972   | 0.119121   |
| 8  | 3              | 0.052065    | 0.226508   | 0.232415   | -0.049600   | -0.183071  | 0.189671   |
| 8  | 4              | 0.114198    | 0.008404   | 0.114507   | 0.049259    | -0.002847  | 0.049341   |
| 8  | 5              | 0.029149    | -0.010487  | 0.030979   | -0.009181   | 0.017237   | 0.019530   |
| 8  | 6              | -0.009341   | 0.015212   | 0.017851   | 0.013403    | 0.001403   | 0.013476   |
| 8  | 7              | -0.066576   | -0.044132  | 0.079875   | 0.068610    | 0.010626   | 0.069428   |
| 8  | 8              | 0.008595    | 0.031477   | 0.032630   | 0.023623    | 0.005265   | 0.024203   |
| 10 | 0              | 0.022888    | 0.000000   | 0.022888   | 0.016172    | 0.000000   | 0.016172   |
| 10 | 1              | 0.008718    | 0.006522   | 0.010888   | -0.012299   | -0.014077  | 0.018692   |
| 10 | 2              | 0.028527    | -0.025780  | 0.038450   | 0.010752    | -0.018162  | 0.021106   |
| 10 | 3              | -0.001660   | 0.043368   | 0.043399   | -0.014777   | -0.042884  | 0.045358   |
| 10 | 4              | 0.005848    | -0.008966  | 0.010705   | -0.007836   | -0.005955  | 0.009842   |
| 10 | 5              | 0.004487    | 0.007137   | 0.008430   | -0.012108   | -0.003955  | 0.012737   |
| 10 | 6              | 0.005612    | -0.006162  | 0.008335   | 0.005876    | -0.008401  | 0.010252   |
| 10 | 7              | 0.001190    | -0.007565  | 0.007658   | -0.000371   | 0.003884   | 0.003902   |
| 10 | 8              | -0.001587   | -0.011552  | 0.011661   | -0.001470   | -0.007980  | 0.008114   |

|    |    |           |           |          |           |           |          |
|----|----|-----------|-----------|----------|-----------|-----------|----------|
| 10 | 9  | 0.012838  | -0.003037 | 0.013192 | -0.011683 | 0.007471  | 0.013867 |
| 10 | 10 | -0.016997 | -0.007194 | 0.018457 | -0.017596 | 0.002272  | 0.017742 |
| 12 | 0  | -0.002921 | 0.000000  | 0.002921 | -0.004039 | 0.000000  | 0.004039 |
| 12 | 1  | 0.000417  | 0.003046  | 0.003074 | -0.000507 | -0.000652 | 0.000826 |
| 12 | 2  | -0.002724 | -0.000435 | 0.002759 | -0.003292 | 0.000324  | 0.003308 |
| 12 | 3  | 0.001496  | 0.001489  | 0.002111 | -0.001207 | -0.000139 | 0.001215 |
| 12 | 4  | -0.000992 | -0.000077 | 0.000995 | -0.000849 | 0.000437  | 0.000955 |
| 12 | 5  | 0.000890  | -0.000125 | 0.000899 | -0.000364 | 0.000214  | 0.000423 |
| 12 | 6  | -0.000808 | -0.000263 | 0.000850 | -0.000778 | 0.000259  | 0.000820 |
| 12 | 7  | 0.000446  | 0.000777  | 0.000896 | -0.000449 | -0.000039 | 0.000450 |
| 12 | 8  | -0.000524 | 0.000335  | 0.000622 | -0.000486 | 0.001028  | 0.001138 |
| 12 | 9  | 0.000990  | -0.000110 | 0.000996 | -0.000516 | 0.000868  | 0.001010 |
| 12 | 10 | -0.000485 | 0.000454  | 0.000664 | -0.000059 | 0.001050  | 0.001051 |
| 12 | 11 | 0.000442  | -0.000762 | 0.000881 | 0.000054  | 0.001215  | 0.001216 |
| 12 | 12 | -0.000427 | 0.000336  | 0.000543 | -0.000148 | 0.000723  | 0.000738 |
| 14 | 0  | -0.000009 | 0.000000  | 0.000009 | 0.000002  | 0.000000  | 0.000002 |
| 14 | 1  | 0.000000  | -0.000002 | 0.000002 | 0.000003  | 0.000008  | 0.000008 |
| 14 | 2  | -0.000008 | -0.000007 | 0.000011 | 0.000002  | -0.000008 | 0.000008 |
| 14 | 3  | -0.000012 | -0.000020 | 0.000024 | 0.000006  | 0.000007  | 0.000009 |
| 14 | 4  | 0.000025  | -0.000014 | 0.000028 | 0.000014  | -0.000016 | 0.000021 |
| 14 | 5  | -0.000011 | 0.000002  | 0.000011 | 0.000003  | -0.000005 | 0.000006 |
| 14 | 6  | 0.000000  | -0.000001 | 0.000001 | -0.000002 | -0.000003 | 0.000004 |
| 14 | 7  | 0.000000  | -0.000004 | 0.000004 | 0.000002  | 0.000002  | 0.000002 |
| 14 | 8  | 0.000004  | -0.000002 | 0.000004 | 0.000003  | -0.000003 | 0.000004 |
| 14 | 9  | -0.000004 | 0.000002  | 0.000004 | 0.000001  | -0.000004 | 0.000004 |
| 14 | 10 | 0.000002  | -0.000001 | 0.000003 | -0.000001 | -0.000003 | 0.000003 |
| 14 | 11 | -0.000001 | 0.000001  | 0.000001 | -0.000001 | -0.000002 | 0.000002 |
| 14 | 12 | 0.000000  | -0.000001 | 0.000001 | 0.000000  | -0.000001 | 0.000001 |
| 14 | 13 | 0.000000  | 0.000001  | 0.000001 | -0.000001 | 0.000000  | 0.000001 |
| 14 | 14 | 0.000003  | 0.000000  | 0.000003 | 0.000002  | -0.000001 | 0.000002 |

a The parameters are only listed for positive q. Values with negative q are related by  $B_{k-q} = (-1)^q B_{kq}^*$ .

Table S9. The ab initio CF parameters for the two Dy<sup>III</sup> ions in **2** given in Iwahara-Chibotaru notation.<sup>1,2</sup>

| k | q <sup>a</sup> | Dy1         |            |            | Dy2         |            |            |
|---|----------------|-------------|------------|------------|-------------|------------|------------|
|   |                | Re(Bkq)     | Im(Bkq)    | Bkq        | Re(Bkq)     | Im(Bkq)    | Bkq        |
| 2 | 0              | -197.206778 | 0.000000   | 197.206778 | -157.473526 | 0.000000   | 157.473526 |
| 2 | 1              | 8.687197    | -18.898049 | 20.799126  | 39.160732   | 7.696743   | 39.909934  |
| 2 | 2              | 55.587897   | -67.085513 | 87.123363  | 91.974126   | -64.914518 | 112.575017 |
| 4 | 0              | -33.489146  | 0.000000   | 33.489146  | 27.690717   | 0.000000   | 27.690717  |

|    |    |            |            |           |            |            |           |
|----|----|------------|------------|-----------|------------|------------|-----------|
| 4  | 1  | -6.556341  | 2.581691   | 7.046328  | 8.566342   | -12.851124 | 15.444533 |
| 4  | 2  | -0.496744  | -4.812062  | 4.837633  | 11.865698  | 11.644659  | 16.625068 |
| 4  | 3  | -6.327684  | -22.271133 | 23.152601 | 24.135383  | -3.528694  | 24.391974 |
| 4  | 4  | -23.655787 | -16.142671 | 28.638822 | -48.151363 | 4.430567   | 48.354769 |
| 6  | 0  | 1.228650   | 0.000000   | 1.228650  | -24.439992 | 0.000000   | 24.439992 |
| 6  | 1  | -4.725096  | 7.691051   | 9.026561  | -17.025467 | -7.669450  | 18.673163 |
| 6  | 2  | -0.274176  | -9.712037  | 9.715906  | 14.069872  | 4.157616   | 14.671301 |
| 6  | 3  | -4.622857  | 23.352693  | 23.805862 | 4.111050   | -3.183018  | 5.199263  |
| 6  | 4  | -3.500001  | -5.457376  | 6.483283  | -13.897193 | -4.976333  | 14.761296 |
| 6  | 5  | -5.006070  | 20.067136  | 20.682134 | 1.202131   | -6.790529  | 6.896116  |
| 6  | 6  | 4.541673   | -11.120082 | 12.011786 | -7.912386  | 15.408624  | 17.321419 |
| 8  | 0  | -0.051198  | 0.000000   | 0.051198  | 0.322255   | 0.000000   | 0.322255  |
| 8  | 1  | 0.042697   | 0.002923   | 0.042797  | 0.020055   | -0.190718  | 0.191770  |
| 8  | 2  | -0.046807  | 0.095966   | 0.106772  | -0.145334  | 0.031162   | 0.148637  |
| 8  | 3  | 0.010626   | -0.199535  | 0.199818  | 0.380822   | -0.104595  | 0.394925  |
| 8  | 4  | 0.076645   | 0.008662   | 0.077133  | -0.034580  | 0.083157   | 0.090060  |
| 8  | 5  | 0.023311   | -0.050700  | 0.055802  | -0.003867  | 0.066959   | 0.067070  |
| 8  | 6  | 0.002624   | 0.012107   | 0.012388  | 0.049679   | -0.086840  | 0.100046  |
| 8  | 7  | 0.002222   | 0.059129   | 0.059171  | -0.038150  | -0.002235  | 0.038215  |
| 8  | 8  | 0.007313   | -0.032663  | 0.033471  | 0.012698   | 0.007898   | 0.014954  |
| 10 | 0  | 0.009827   | 0.000000   | 0.009827  | 0.017438   | 0.000000   | 0.017438  |
| 10 | 1  | 0.011347   | -0.020234  | 0.023199  | -0.018538  | -0.009985  | 0.021056  |
| 10 | 2  | 0.010503   | 0.006824   | 0.012525  | 0.002633   | -0.008734  | 0.009122  |
| 10 | 3  | -0.005624  | -0.033648  | 0.034114  | -0.016836  | 0.016250   | 0.023399  |
| 10 | 4  | -0.006705  | 0.005347   | 0.008576  | 0.007188   | 0.002414   | 0.007583  |
| 10 | 5  | -0.002645  | -0.008725  | 0.009117  | -0.001411  | 0.004448   | 0.004666  |
| 10 | 6  | 0.010309   | -0.000382  | 0.010316  | -0.003813  | -0.005265  | 0.006501  |
| 10 | 7  | 0.008785   | 0.001901   | 0.008989  | -0.000395  | -0.009456  | 0.009464  |
| 10 | 8  | 0.005763   | -0.000043  | 0.005763  | 0.003377   | 0.002511   | 0.004209  |
| 10 | 9  | 0.011151   | -0.006632  | 0.012974  | -0.002592  | 0.018672   | 0.018851  |
| 10 | 10 | -0.006280  | 0.010089   | 0.011884  | 0.016183   | -0.031251  | 0.035192  |
| 12 | 0  | -0.003484  | 0.000000   | 0.003484  | -0.001601  | 0.000000   | 0.001601  |
| 12 | 1  | -0.000186  | -0.001533  | 0.001544  | 0.007840   | 0.000260   | 0.007844  |
| 12 | 2  | -0.003481  | 0.000515   | 0.003518  | -0.002579  | -0.001337  | 0.002906  |
| 12 | 3  | 0.000946   | -0.000034  | 0.000947  | -0.003529  | 0.000494   | 0.003563  |
| 12 | 4  | -0.001258  | 0.000399   | 0.001320  | 0.001602   | 0.000094   | 0.001604  |
| 12 | 5  | 0.001498   | 0.000432   | 0.001559  | -0.000084  | 0.000341   | 0.000351  |
| 12 | 6  | -0.000823  | -0.000039  | 0.000824  | 0.000063   | -0.001107  | 0.001109  |

|    |    |           |           |          |           |           |          |
|----|----|-----------|-----------|----------|-----------|-----------|----------|
| 12 | 7  | 0.000279  | -0.000371 | 0.000464 | -0.001240 | 0.000485  | 0.001331 |
| 12 | 8  | -0.001092 | -0.000416 | 0.001168 | 0.000489  | 0.000117  | 0.000503 |
| 12 | 9  | 0.000720  | 0.000060  | 0.000722 | -0.000184 | 0.000608  | 0.000635 |
| 12 | 10 | -0.001112 | -0.000499 | 0.001219 | 0.000401  | -0.000567 | 0.000694 |
| 12 | 11 | 0.000890  | 0.000675  | 0.001117 | 0.000382  | 0.000353  | 0.000520 |
| 12 | 12 | -0.000359 | -0.000316 | 0.000478 | -0.000528 | -0.000782 | 0.000943 |
| 14 | 0  | 0.000001  | 0.000000  | 0.000001 | 0.000010  | 0.000000  | 0.000010 |
| 14 | 1  | 0.000005  | 0.000008  | 0.000010 | -0.000036 | 0.000001  | 0.000036 |
| 14 | 2  | 0.000005  | 0.000006  | 0.000007 | 0.000007  | -0.000013 | 0.000014 |
| 14 | 3  | 0.000000  | 0.000004  | 0.000004 | -0.000005 | 0.000016  | 0.000017 |
| 14 | 4  | 0.000023  | 0.000008  | 0.000024 | -0.000001 | -0.000007 | 0.000007 |
| 14 | 5  | -0.000007 | -0.000013 | 0.000015 | 0.000007  | -0.000003 | 0.000008 |
| 14 | 6  | -0.000001 | 0.000005  | 0.000005 | 0.000002  | 0.000002  | 0.000002 |
| 14 | 7  | 0.000002  | 0.000000  | 0.000002 | -0.000002 | 0.000000  | 0.000002 |
| 14 | 8  | 0.000005  | 0.000001  | 0.000005 | -0.000002 | 0.000001  | 0.000002 |
| 14 | 9  | -0.000004 | -0.000003 | 0.000005 | 0.000000  | -0.000003 | 0.000003 |
| 14 | 10 | 0.000003  | 0.000000  | 0.000003 | 0.000000  | 0.000002  | 0.000002 |
| 14 | 11 | -0.000001 | -0.000001 | 0.000002 | 0.000000  | -0.000001 | 0.000001 |
| 14 | 12 | 0.000001  | 0.000000  | 0.000001 | 0.000002  | 0.000000  | 0.000002 |
| 14 | 13 | -0.000001 | -0.000002 | 0.000002 | 0.000001  | -0.000002 | 0.000002 |
| 14 | 14 | 0.000001  | -0.000002 | 0.000002 | -0.000004 | 0.000003  | 0.000005 |

a The parameters are only listed for positive q. Values with negative q are related by  $B_{k-q} = (-1)^q B_{kq}^*$ .

Table S10. The ab initio CF parameters for the two Dy<sup>III</sup> ions in **3** given in Iwahara-Chibotaru notation.<sup>1, 2</sup>

| k | q <sup>a</sup> | Dy1         |            |            | Dy2         |            |            |
|---|----------------|-------------|------------|------------|-------------|------------|------------|
|   |                | Re(Bkq)     | Im(Bkq)    | Bkq        | Re(Bkq)     | Im(Bkq)    | Bkq        |
| 2 | 0              | -242.578613 | 0.000000   | 242.578613 | -204.284464 | 0.000000   | 204.284464 |
| 2 | 1              | -23.791257  | -6.537954  | 24.673240  | -16.433649  | -27.985058 | 32.453479  |
| 2 | 2              | 106.339326  | -3.697890  | 106.403603 | 75.406177   | 11.024038  | 76.207749  |
| 4 | 0              | -49.665446  | 0.000000   | 49.665446  | -55.101500  | 0.000000   | 55.101500  |
| 4 | 1              | 18.367594   | -9.740517  | 20.790530  | 6.109510    | 4.952908   | 7.864948   |
| 4 | 2              | 8.717286    | 7.907171   | 11.769215  | 6.946280    | 6.532216   | 9.535232   |
| 4 | 3              | -2.465684   | -29.413430 | 29.516596  | 2.803538    | -21.046166 | 21.232073  |
| 4 | 4              | -15.600705  | 30.902922  | 34.617518  | -19.761656  | 22.761631  | 30.143240  |
| 6 | 0              | -8.343477   | 0.000000   | 8.343477   | -0.131228   | 0.000000   | 0.131228   |
| 6 | 1              | -3.342524   | 8.192830   | 8.848442   | 5.375274    | 10.742991  | 12.012719  |
| 6 | 2              | -12.290044  | 7.580891   | 14.440051  | -2.609126   | 10.568969  | 10.886259  |
| 6 | 3              | -1.690696   | 14.006351  | 14.108024  | 10.589220   | 18.831554  | 21.604606  |
| 6 | 4              | -13.152667  | 11.555996  | 17.508104  | -4.909646   | 8.226819   | 9.580458   |

|    |    |           |           |           |           |           |           |
|----|----|-----------|-----------|-----------|-----------|-----------|-----------|
| 6  | 5  | 8.880950  | 14.378021 | 16.899667 | 14.200514 | 12.385108 | 18.842651 |
| 6  | 6  | 0.514401  | 12.086749 | 12.097691 | 9.846583  | 9.151488  | 13.442654 |
| 8  | 0  | -0.191037 | 0.000000  | 0.191037  | 0.002064  | 0.000000  | 0.002064  |
| 8  | 1  | 0.049842  | -0.090616 | 0.103419  | -0.060196 | -0.020994 | 0.063752  |
| 8  | 2  | -0.005679 | 0.068629  | 0.068863  | -0.008349 | -0.114068 | 0.114373  |
| 8  | 3  | 0.022760  | -0.187512 | 0.188888  | -0.093972 | -0.156125 | 0.182225  |
| 8  | 4  | 0.146419  | -0.002330 | 0.146438  | 0.086778  | -0.053267 | 0.101823  |
| 8  | 5  | -0.047302 | -0.040480 | 0.062258  | -0.012767 | -0.009358 | 0.015829  |
| 8  | 6  | -0.030606 | 0.021146  | 0.037201  | 0.007417  | 0.012591  | 0.014613  |
| 8  | 7  | 0.058704  | 0.064042  | 0.086876  | 0.051124  | 0.038290  | 0.063873  |
| 8  | 8  | 0.022647  | 0.043187  | 0.048765  | 0.038253  | 0.022239  | 0.044248  |
| 10 | 0  | 0.044654  | 0.000000  | 0.044654  | 0.008493  | 0.000000  | 0.008493  |
| 10 | 1  | 0.013897  | 0.014811  | 0.020310  | -0.018897 | -0.023989 | 0.030538  |
| 10 | 2  | 0.048895  | -0.025954 | 0.055356  | 0.018819  | -0.013643 | 0.023244  |
| 10 | 3  | 0.009548  | -0.017758 | 0.020162  | -0.013887 | -0.048349 | 0.050304  |
| 10 | 4  | 0.010302  | -0.020432 | 0.022882  | -0.006054 | -0.003859 | 0.007179  |
| 10 | 5  | -0.005058 | -0.006714 | 0.008406  | -0.006778 | -0.005961 | 0.009026  |
| 10 | 6  | 0.000841  | -0.005636 | 0.005699  | 0.003082  | -0.004247 | 0.005247  |
| 10 | 7  | -0.002370 | 0.009016  | 0.009322  | -0.004880 | 0.012294  | 0.013227  |
| 10 | 8  | 0.002320  | -0.018485 | 0.018630  | 0.002424  | -0.005010 | 0.005566  |
| 10 | 9  | -0.009708 | 0.000729  | 0.009735  | -0.010440 | 0.005374  | 0.011742  |
| 10 | 10 | -0.014742 | -0.013818 | 0.020206  | -0.018200 | -0.003205 | 0.018480  |
| 12 | 0  | 0.000998  | 0.000000  | 0.000998  | -0.004075 | 0.000000  | 0.004075  |
| 12 | 1  | -0.001036 | -0.004136 | 0.004264  | -0.000909 | -0.003414 | 0.003533  |
| 12 | 2  | -0.000013 | -0.000740 | 0.000740  | -0.004072 | 0.000675  | 0.004128  |
| 12 | 3  | -0.001816 | -0.002478 | 0.003072  | -0.001572 | -0.000604 | 0.001684  |
| 12 | 4  | -0.000494 | -0.000514 | 0.000712  | -0.001698 | 0.000162  | 0.001706  |
| 12 | 5  | -0.001042 | -0.000224 | 0.001066  | -0.001320 | 0.001054  | 0.001689  |
| 12 | 6  | 0.000082  | -0.000753 | 0.000757  | -0.000487 | 0.000042  | 0.000489  |
| 12 | 7  | -0.000111 | -0.000684 | 0.000693  | -0.000449 | -0.000524 | 0.000690  |
| 12 | 8  | -0.000412 | -0.000206 | 0.000461  | -0.000233 | 0.000787  | 0.000821  |
| 12 | 9  | -0.001240 | -0.000360 | 0.001291  | -0.000685 | 0.000513  | 0.000856  |
| 12 | 10 | -0.000726 | 0.000245  | 0.000766  | -0.000176 | 0.000949  | 0.000965  |
| 12 | 11 | -0.000772 | 0.000516  | 0.000928  | 0.000112  | 0.001121  | 0.001127  |
| 12 | 12 | -0.000514 | 0.000061  | 0.000518  | 0.000022  | 0.000612  | 0.000612  |
| 14 | 0  | -0.000011 | 0.000000  | 0.000011  | -0.000014 | 0.000000  | 0.000014  |
| 14 | 1  | -0.000002 | -0.000011 | 0.000011  | -0.000005 | 0.000008  | 0.000009  |
| 14 | 2  | -0.000015 | -0.000002 | 0.000015  | 0.000000  | -0.000010 | 0.000010  |

|    |    |           |           |          |           |           |          |
|----|----|-----------|-----------|----------|-----------|-----------|----------|
| 14 | 3  | 0.000020  | 0.000029  | 0.000036 | 0.000015  | 0.000019  | 0.000024 |
| 14 | 4  | 0.000013  | 0.000002  | 0.000013 | 0.000030  | -0.000026 | 0.000040 |
| 14 | 5  | 0.000013  | 0.000010  | 0.000017 | 0.000009  | -0.000014 | 0.000017 |
| 14 | 6  | -0.000002 | 0.000006  | 0.000007 | -0.000004 | -0.000001 | 0.000004 |
| 14 | 7  | 0.000000  | 0.000004  | 0.000004 | -0.000001 | 0.000004  | 0.000004 |
| 14 | 8  | 0.000002  | 0.000001  | 0.000003 | 0.000003  | -0.000005 | 0.000006 |
| 14 | 9  | 0.000004  | 0.000001  | 0.000004 | 0.000002  | -0.000005 | 0.000005 |
| 14 | 10 | 0.000003  | 0.000001  | 0.000003 | 0.000002  | -0.000003 | 0.000003 |
| 14 | 11 | 0.000000  | -0.000001 | 0.000001 | 0.000000  | -0.000001 | 0.000001 |
| 14 | 12 | 0.000001  | -0.000001 | 0.000002 | 0.000000  | -0.000001 | 0.000001 |
| 14 | 13 | -0.000001 | 0.000000  | 0.000001 | -0.000002 | -0.000001 | 0.000002 |
| 14 | 14 | 0.000003  | 0.000000  | 0.000003 | 0.000002  | -0.000001 | 0.000002 |

a The parameters are only listed for positive q. Values with negative q are related by  $B_{k-q} = (-1)^q B_{kq}^*$ .

Table S11. Squared projections of the the CF eigenstates corresponding to the eighth lowest Kramers doublets (KDs) of **1** onto angular momentum eigenstates with total angular momentum  $J = 15/2$  and various angular momentum projections M

| M     | Dy1   |       |       |       |       |       |       |       |
|-------|-------|-------|-------|-------|-------|-------|-------|-------|
|       | KD 1  |       | KD 2  |       | KD 3  |       | KD 4  |       |
| -15/2 | 0.074 | 0.891 | 0.001 | 0.000 | 0.006 | 0.004 | 0.000 | 0.016 |
| -13/2 | 0.000 | 0.001 | 0.237 | 0.491 | 0.001 | 0.102 | 0.004 | 0.098 |
| -11/2 | 0.001 | 0.015 | 0.009 | 0.000 | 0.153 | 0.212 | 0.006 | 0.323 |
| -9/2  | 0.001 | 0.007 | 0.039 | 0.079 | 0.010 | 0.023 | 0.008 | 0.319 |
| -7/2  | 0.001 | 0.007 | 0.005 | 0.001 | 0.083 | 0.117 | 0.002 | 0.032 |
| -5/2  | 0.000 | 0.002 | 0.022 | 0.043 | 0.016 | 0.049 | 0.009 | 0.076 |
| -3/2  | 0.000 | 0.000 | 0.011 | 0.032 | 0.035 | 0.065 | 0.015 | 0.051 |
| -1/2  | 0.000 | 0.000 | 0.029 | 0.002 | 0.072 | 0.053 | 0.026 | 0.014 |
| +1/2  | 0.000 | 0.000 | 0.002 | 0.029 | 0.053 | 0.072 | 0.014 | 0.026 |
| +3/2  | 0.000 | 0.000 | 0.032 | 0.011 | 0.065 | 0.035 | 0.051 | 0.015 |
| +5/2  | 0.002 | 0.000 | 0.043 | 0.022 | 0.049 | 0.016 | 0.076 | 0.009 |
| +7/2  | 0.007 | 0.001 | 0.001 | 0.005 | 0.117 | 0.083 | 0.032 | 0.002 |
| +9/2  | 0.007 | 0.001 | 0.079 | 0.039 | 0.023 | 0.010 | 0.319 | 0.008 |
| +11/2 | 0.015 | 0.001 | 0.000 | 0.009 | 0.212 | 0.153 | 0.323 | 0.006 |
| +13/2 | 0.001 | 0.000 | 0.491 | 0.237 | 0.102 | 0.001 | 0.098 | 0.004 |
| +15/2 | 0.891 | 0.074 | 0.000 | 0.001 | 0.004 | 0.006 | 0.016 | 0.000 |
| M     | KD 5  |       | KD 6  |       | KD 7  |       | KD 8  |       |
| -15/2 | 0.002 | 0.001 | 0.002 | 0.000 | 0.000 | 0.001 | 0.000 | 0.000 |
| -13/2 | 0.034 | 0.002 | 0.002 | 0.012 | 0.001 | 0.010 | 0.001 | 0.004 |
| -11/2 | 0.121 | 0.008 | 0.018 | 0.022 | 0.077 | 0.002 | 0.019 | 0.014 |

|       |       |       |       |       |       |       |       |       |
|-------|-------|-------|-------|-------|-------|-------|-------|-------|
| -9/2  | 0.132 | 0.011 | 0.068 | 0.014 | 0.123 | 0.060 | 0.033 | 0.074 |
| -7/2  | 0.266 | 0.066 | 0.041 | 0.046 | 0.150 | 0.004 | 0.098 | 0.082 |
| -5/2  | 0.094 | 0.088 | 0.258 | 0.010 | 0.050 | 0.071 | 0.072 | 0.142 |
| -3/2  | 0.026 | 0.031 | 0.147 | 0.185 | 0.005 | 0.169 | 0.093 | 0.135 |
| -1/2  | 0.084 | 0.034 | 0.061 | 0.115 | 0.164 | 0.113 | 0.137 | 0.096 |
| +1/2  | 0.034 | 0.084 | 0.115 | 0.061 | 0.113 | 0.164 | 0.096 | 0.137 |
| +3/2  | 0.031 | 0.026 | 0.185 | 0.147 | 0.169 | 0.005 | 0.135 | 0.093 |
| +5/2  | 0.088 | 0.094 | 0.010 | 0.258 | 0.071 | 0.050 | 0.142 | 0.072 |
| +7/2  | 0.066 | 0.266 | 0.046 | 0.041 | 0.004 | 0.150 | 0.082 | 0.098 |
| +9/2  | 0.011 | 0.132 | 0.014 | 0.068 | 0.060 | 0.123 | 0.074 | 0.033 |
| +11/2 | 0.008 | 0.121 | 0.022 | 0.018 | 0.002 | 0.077 | 0.014 | 0.019 |
| +13/2 | 0.002 | 0.034 | 0.012 | 0.002 | 0.010 | 0.001 | 0.004 | 0.001 |
| +15/2 | 0.001 | 0.002 | 0.000 | 0.002 | 0.001 | 0.000 | 0.000 | 0.000 |

Dy2

|       | KD 1  |       | KD 2  |       | KD 3  |       | KD 4  |       |
|-------|-------|-------|-------|-------|-------|-------|-------|-------|
| -15/2 | 0.868 | 0.095 | 0.001 | 0.001 | 0.007 | 0.000 | 0.018 | 0.002 |
| -13/2 | 0.002 | 0.000 | 0.665 | 0.137 | 0.000 | 0.061 | 0.045 | 0.022 |
| -11/2 | 0.015 | 0.002 | 0.007 | 0.011 | 0.305 | 0.037 | 0.319 | 0.064 |
| -9/2  | 0.010 | 0.001 | 0.067 | 0.014 | 0.036 | 0.022 | 0.271 | 0.043 |
| -7/2  | 0.004 | 0.000 | 0.002 | 0.008 | 0.143 | 0.024 | 0.021 | 0.002 |
| -5/2  | 0.002 | 0.000 | 0.023 | 0.001 | 0.044 | 0.050 | 0.049 | 0.014 |
| -3/2  | 0.000 | 0.000 | 0.038 | 0.003 | 0.065 | 0.023 | 0.043 | 0.062 |
| -1/2  | 0.000 | 0.000 | 0.002 | 0.020 | 0.120 | 0.063 | 0.011 | 0.015 |
| +1/2  | 0.000 | 0.000 | 0.020 | 0.002 | 0.063 | 0.120 | 0.015 | 0.011 |
| +3/2  | 0.000 | 0.000 | 0.003 | 0.038 | 0.023 | 0.065 | 0.062 | 0.043 |
| +5/2  | 0.000 | 0.002 | 0.001 | 0.023 | 0.050 | 0.044 | 0.014 | 0.049 |
| +7/2  | 0.000 | 0.004 | 0.008 | 0.002 | 0.024 | 0.143 | 0.002 | 0.021 |
| +9/2  | 0.001 | 0.010 | 0.014 | 0.067 | 0.022 | 0.036 | 0.043 | 0.271 |
| +11/2 | 0.002 | 0.015 | 0.011 | 0.007 | 0.037 | 0.305 | 0.064 | 0.319 |
| +13/2 | 0.000 | 0.002 | 0.137 | 0.665 | 0.061 | 0.000 | 0.022 | 0.045 |
| +15/2 | 0.095 | 0.868 | 0.001 | 0.001 | 0.000 | 0.007 | 0.002 | 0.018 |

| M     | KD 5  |       | KD 6  |       | KD 7  |       | KD 8  |       |
|-------|-------|-------|-------|-------|-------|-------|-------|-------|
| -15/2 | 0.004 | 0.000 | 0.004 | 0.000 | 0.001 | 0.000 | 0.000 | 0.000 |
| -13/2 | 0.033 | 0.002 | 0.007 | 0.011 | 0.007 | 0.003 | 0.001 | 0.004 |
| -11/2 | 0.080 | 0.013 | 0.003 | 0.064 | 0.036 | 0.004 | 0.007 | 0.032 |
| -9/2  | 0.143 | 0.006 | 0.087 | 0.097 | 0.053 | 0.026 | 0.021 | 0.104 |
| -7/2  | 0.395 | 0.019 | 0.025 | 0.065 | 0.074 | 0.024 | 0.027 | 0.166 |
| -5/2  | 0.188 | 0.022 | 0.246 | 0.097 | 0.021 | 0.041 | 0.034 | 0.167 |

|       |       |       |       |       |       |       |       |       |
|-------|-------|-------|-------|-------|-------|-------|-------|-------|
| -3/2  | 0.004 | 0.043 | 0.105 | 0.137 | 0.263 | 0.003 | 0.006 | 0.206 |
| -1/2  | 0.045 | 0.003 | 0.002 | 0.051 | 0.280 | 0.164 | 0.139 | 0.084 |
| +1/2  | 0.003 | 0.045 | 0.051 | 0.002 | 0.164 | 0.280 | 0.084 | 0.139 |
| +3/2  | 0.043 | 0.004 | 0.137 | 0.105 | 0.003 | 0.263 | 0.206 | 0.006 |
| +5/2  | 0.022 | 0.188 | 0.097 | 0.246 | 0.041 | 0.021 | 0.167 | 0.034 |
| +7/2  | 0.019 | 0.395 | 0.065 | 0.025 | 0.024 | 0.074 | 0.166 | 0.027 |
| +9/2  | 0.006 | 0.143 | 0.097 | 0.087 | 0.026 | 0.053 | 0.104 | 0.021 |
| +11/2 | 0.013 | 0.080 | 0.064 | 0.003 | 0.004 | 0.036 | 0.032 | 0.007 |
| +13/2 | 0.002 | 0.033 | 0.011 | 0.007 | 0.003 | 0.007 | 0.004 | 0.001 |
| +15/2 | 0.000 | 0.004 | 0.000 | 0.004 | 0.000 | 0.001 | 0.000 | 0.000 |

Table S12. Squared projections of the the CF eigenstates corresponding to the eighth lowest Kramers doublets (KDs) of **2** onto angular momentum eigenstates with total angular momentum  $J = 15/2$  and various angular momentum projections  $M$

| Dy1   |       |       |       |       |       |       |       |       |
|-------|-------|-------|-------|-------|-------|-------|-------|-------|
| M     | KD 1  |       | KD 2  |       | KD 3  |       | KD 4  |       |
| -15/2 | 0.924 | 0.011 | 0.001 | 0.002 | 0.022 | 0.000 | 0.018 | 0.000 |
| -13/2 | 0.004 | 0.000 | 0.175 | 0.626 | 0.008 | 0.048 | 0.052 | 0.030 |
| -11/2 | 0.040 | 0.000 | 0.003 | 0.017 | 0.326 | 0.007 | 0.316 | 0.032 |
| -9/2  | 0.014 | 0.000 | 0.024 | 0.066 | 0.018 | 0.014 | 0.220 | 0.092 |
| -7/2  | 0.001 | 0.000 | 0.004 | 0.007 | 0.154 | 0.000 | 0.001 | 0.009 |
| -5/2  | 0.002 | 0.000 | 0.003 | 0.008 | 0.034 | 0.056 | 0.038 | 0.063 |
| -3/2  | 0.001 | 0.000 | 0.013 | 0.025 | 0.067 | 0.032 | 0.019 | 0.087 |
| -1/2  | 0.001 | 0.000 | 0.014 | 0.013 | 0.135 | 0.078 | 0.015 | 0.007 |
| +1/2  | 0.000 | 0.001 | 0.013 | 0.014 | 0.078 | 0.135 | 0.007 | 0.015 |
| +3/2  | 0.000 | 0.001 | 0.025 | 0.013 | 0.032 | 0.067 | 0.087 | 0.019 |
| +5/2  | 0.000 | 0.002 | 0.008 | 0.003 | 0.056 | 0.034 | 0.063 | 0.038 |
| +7/2  | 0.000 | 0.001 | 0.007 | 0.004 | 0.000 | 0.154 | 0.009 | 0.001 |
| +9/2  | 0.000 | 0.014 | 0.066 | 0.024 | 0.014 | 0.018 | 0.092 | 0.220 |
| +11/2 | 0.000 | 0.040 | 0.017 | 0.003 | 0.007 | 0.326 | 0.032 | 0.316 |
| +13/2 | 0.000 | 0.004 | 0.626 | 0.175 | 0.048 | 0.008 | 0.030 | 0.052 |
| +15/2 | 0.011 | 0.924 | 0.002 | 0.001 | 0.000 | 0.022 | 0.000 | 0.018 |
| M     | KD 5  |       | KD 6  |       | KD 7  |       | KD 8  |       |
| -15/2 | 0.001 | 0.007 | 0.007 | 0.001 | 0.001 | 0.003 | 0.001 | 0.000 |
| -13/2 | 0.014 | 0.000 | 0.011 | 0.008 | 0.016 | 0.004 | 0.002 | 0.004 |
| -11/2 | 0.000 | 0.120 | 0.056 | 0.008 | 0.019 | 0.031 | 0.005 | 0.020 |
| -9/2  | 0.089 | 0.036 | 0.205 | 0.011 | 0.119 | 0.015 | 0.019 | 0.058 |
| -7/2  | 0.029 | 0.317 | 0.093 | 0.086 | 0.118 | 0.048 | 0.005 | 0.127 |
| -5/2  | 0.054 | 0.114 | 0.057 | 0.152 | 0.081 | 0.170 | 0.047 | 0.121 |



|       |       |       |       |       |       |       |       |       |
|-------|-------|-------|-------|-------|-------|-------|-------|-------|
| -3/2  | 0.051 | 0.103 | 0.076 | 0.009 | 0.076 | 0.189 | 0.025 | 0.227 |
| -1/2  | 0.015 | 0.050 | 0.096 | 0.125 | 0.012 | 0.098 | 0.216 | 0.124 |
| +1/2  | 0.050 | 0.015 | 0.125 | 0.096 | 0.098 | 0.012 | 0.124 | 0.216 |
| +3/2  | 0.103 | 0.051 | 0.009 | 0.076 | 0.189 | 0.076 | 0.227 | 0.025 |
| +5/2  | 0.114 | 0.054 | 0.152 | 0.057 | 0.170 | 0.081 | 0.121 | 0.047 |
| +7/2  | 0.317 | 0.029 | 0.086 | 0.093 | 0.048 | 0.118 | 0.127 | 0.005 |
| +9/2  | 0.036 | 0.089 | 0.011 | 0.205 | 0.015 | 0.119 | 0.058 | 0.019 |
| +11/2 | 0.120 | 0.000 | 0.008 | 0.056 | 0.031 | 0.019 | 0.020 | 0.005 |
| +13/2 | 0.000 | 0.014 | 0.008 | 0.011 | 0.004 | 0.016 | 0.004 | 0.002 |
| +15/2 | 0.007 | 0.001 | 0.001 | 0.007 | 0.003 | 0.001 | 0.000 | 0.001 |

Dy2

| M     | KD 1  |       | KD 2  |       | KD 3  |       | KD 4  |       |
|-------|-------|-------|-------|-------|-------|-------|-------|-------|
| -15/2 | 0.050 | 0.590 | 0.028 | 0.015 | 0.157 | 0.002 | 0.003 | 0.086 |
| -13/2 | 0.005 | 0.031 | 0.093 | 0.272 | 0.218 | 0.002 | 0.022 | 0.016 |
| -11/2 | 0.015 | 0.199 | 0.008 | 0.027 | 0.332 | 0.004 | 0.002 | 0.006 |
| -9/2  | 0.005 | 0.019 | 0.078 | 0.301 | 0.165 | 0.003 | 0.001 | 0.029 |
| -7/2  | 0.005 | 0.066 | 0.010 | 0.012 | 0.012 | 0.000 | 0.025 | 0.418 |
| -5/2  | 0.002 | 0.002 | 0.026 | 0.100 | 0.057 | 0.005 | 0.022 | 0.000 |
| -3/2  | 0.000 | 0.011 | 0.003 | 0.003 | 0.017 | 0.008 | 0.008 | 0.224 |
| -1/2  | 0.001 | 0.000 | 0.004 | 0.020 | 0.015 | 0.002 | 0.136 | 0.001 |
| +1/2  | 0.000 | 0.001 | 0.020 | 0.004 | 0.002 | 0.015 | 0.001 | 0.136 |
| +3/2  | 0.011 | 0.000 | 0.003 | 0.003 | 0.008 | 0.017 | 0.224 | 0.008 |
| +5/2  | 0.002 | 0.002 | 0.100 | 0.026 | 0.005 | 0.057 | 0.000 | 0.022 |
| +7/2  | 0.066 | 0.005 | 0.012 | 0.010 | 0.000 | 0.012 | 0.418 | 0.025 |
| +9/2  | 0.019 | 0.005 | 0.301 | 0.078 | 0.003 | 0.165 | 0.029 | 0.001 |
| +11/2 | 0.199 | 0.015 | 0.027 | 0.008 | 0.004 | 0.332 | 0.006 | 0.002 |
| +13/2 | 0.031 | 0.005 | 0.272 | 0.093 | 0.002 | 0.218 | 0.016 | 0.022 |
| +15/2 | 0.590 | 0.050 | 0.015 | 0.028 | 0.002 | 0.157 | 0.086 | 0.003 |

| M     | KD 5  |       | KD 6  |       | KD 7  |       | KD 8  |       |
|-------|-------|-------|-------|-------|-------|-------|-------|-------|
| -15/2 | 0.004 | 0.031 | 0.027 | 0.001 | 0.005 | 0.000 | 0.002 | 0.000 |
| -13/2 | 0.075 | 0.074 | 0.147 | 0.015 | 0.002 | 0.017 | 0.000 | 0.011 |
| -11/2 | 0.005 | 0.079 | 0.267 | 0.000 | 0.020 | 0.006 | 0.028 | 0.000 |
| -9/2  | 0.014 | 0.066 | 0.211 | 0.033 | 0.013 | 0.023 | 0.003 | 0.036 |
| -7/2  | 0.093 | 0.040 | 0.090 | 0.050 | 0.081 | 0.048 | 0.039 | 0.010 |
| -5/2  | 0.108 | 0.202 | 0.009 | 0.071 | 0.089 | 0.197 | 0.026 | 0.085 |
| -3/2  | 0.048 | 0.020 | 0.016 | 0.025 | 0.254 | 0.077 | 0.218 | 0.067 |
| -1/2  | 0.089 | 0.052 | 0.029 | 0.009 | 0.021 | 0.148 | 0.084 | 0.390 |
| +1/2  | 0.052 | 0.089 | 0.009 | 0.029 | 0.148 | 0.021 | 0.390 | 0.084 |

|       |       |       |       |       |       |       |       |       |
|-------|-------|-------|-------|-------|-------|-------|-------|-------|
| +3/2  | 0.020 | 0.048 | 0.025 | 0.016 | 0.077 | 0.254 | 0.067 | 0.218 |
| +5/2  | 0.202 | 0.108 | 0.071 | 0.009 | 0.197 | 0.089 | 0.085 | 0.026 |
| +7/2  | 0.040 | 0.093 | 0.050 | 0.090 | 0.048 | 0.081 | 0.010 | 0.039 |
| +9/2  | 0.066 | 0.014 | 0.033 | 0.211 | 0.023 | 0.013 | 0.036 | 0.003 |
| +11/2 | 0.079 | 0.005 | 0.000 | 0.267 | 0.006 | 0.020 | 0.000 | 0.028 |
| +13/2 | 0.074 | 0.075 | 0.015 | 0.147 | 0.017 | 0.002 | 0.011 | 0.000 |
| +15/2 | 0.031 | 0.004 | 0.001 | 0.027 | 0.000 | 0.005 | 0.000 | 0.002 |

Table S13. Squared projections of the the CF eigenstates corresponding to the eighth lowest Kramers doublets (KDs) of **3** onto angular momentum eigenstates with total angular momentum  $J = 15/2$  and various angular momentum projections  $M$

| Dy1   |       |       |       |       |       |       |       |       |
|-------|-------|-------|-------|-------|-------|-------|-------|-------|
| M     | KD 1  |       | KD 2  |       | KD 3  |       | KD 4  |       |
| -15/2 | 0.938 | 0.040 | 0.000 | 0.001 | 0.003 | 0.008 | 0.002 | 0.000 |
| -13/2 | 0.000 | 0.000 | 0.388 | 0.237 | 0.106 | 0.028 | 0.177 | 0.034 |
| -11/2 | 0.008 | 0.000 | 0.004 | 0.008 | 0.146 | 0.309 | 0.101 | 0.002 |
| -9/2  | 0.001 | 0.000 | 0.091 | 0.057 | 0.001 | 0.001 | 0.310 | 0.066 |
| -7/2  | 0.009 | 0.000 | 0.006 | 0.017 | 0.064 | 0.152 | 0.028 | 0.008 |
| -5/2  | 0.002 | 0.000 | 0.059 | 0.048 | 0.007 | 0.019 | 0.125 | 0.016 |
| -3/2  | 0.001 | 0.000 | 0.028 | 0.025 | 0.048 | 0.039 | 0.025 | 0.021 |
| -1/2  | 0.000 | 0.000 | 0.000 | 0.032 | 0.005 | 0.065 | 0.060 | 0.023 |
| +1/2  | 0.000 | 0.000 | 0.032 | 0.000 | 0.065 | 0.005 | 0.023 | 0.060 |
| +3/2  | 0.000 | 0.001 | 0.025 | 0.028 | 0.039 | 0.048 | 0.021 | 0.025 |
| +5/2  | 0.000 | 0.002 | 0.048 | 0.059 | 0.019 | 0.007 | 0.016 | 0.125 |
| +7/2  | 0.000 | 0.009 | 0.017 | 0.006 | 0.152 | 0.064 | 0.008 | 0.028 |
| +9/2  | 0.000 | 0.001 | 0.057 | 0.091 | 0.001 | 0.001 | 0.066 | 0.310 |
| +11/2 | 0.000 | 0.008 | 0.008 | 0.004 | 0.309 | 0.146 | 0.002 | 0.101 |
| +13/2 | 0.000 | 0.000 | 0.237 | 0.388 | 0.028 | 0.106 | 0.034 | 0.177 |
| +15/2 | 0.040 | 0.938 | 0.001 | 0.000 | 0.008 | 0.003 | 0.000 | 0.002 |
| M     | KD 5  |       | KD 6  |       | KD 7  |       | KD 8  |       |
| -15/2 | 0.000 | 0.002 | 0.003 | 0.000 | 0.001 | 0.000 | 0.000 | 0.001 |
| -13/2 | 0.004 | 0.003 | 0.005 | 0.003 | 0.002 | 0.007 | 0.003 | 0.003 |
| -11/2 | 0.011 | 0.283 | 0.065 | 0.010 | 0.004 | 0.020 | 0.002 | 0.027 |
| -9/2  | 0.057 | 0.012 | 0.039 | 0.209 | 0.053 | 0.020 | 0.027 | 0.055 |
| -7/2  | 0.011 | 0.189 | 0.199 | 0.030 | 0.119 | 0.011 | 0.018 | 0.138 |
| -5/2  | 0.023 | 0.103 | 0.065 | 0.103 | 0.056 | 0.143 | 0.066 | 0.165 |
| -3/2  | 0.030 | 0.138 | 0.084 | 0.080 | 0.182 | 0.046 | 0.049 | 0.206 |
| -1/2  | 0.077 | 0.057 | 0.029 | 0.075 | 0.025 | 0.311 | 0.096 | 0.144 |
| +1/2  | 0.057 | 0.077 | 0.075 | 0.029 | 0.311 | 0.025 | 0.144 | 0.096 |

|       |       |       |       |       |       |       |       |       |
|-------|-------|-------|-------|-------|-------|-------|-------|-------|
| +3/2  | 0.138 | 0.030 | 0.080 | 0.084 | 0.046 | 0.182 | 0.206 | 0.049 |
| +5/2  | 0.103 | 0.023 | 0.103 | 0.065 | 0.143 | 0.056 | 0.165 | 0.066 |
| +7/2  | 0.189 | 0.011 | 0.030 | 0.199 | 0.011 | 0.119 | 0.138 | 0.018 |
| +9/2  | 0.012 | 0.057 | 0.209 | 0.039 | 0.020 | 0.053 | 0.055 | 0.027 |
| +11/2 | 0.283 | 0.011 | 0.010 | 0.065 | 0.020 | 0.004 | 0.027 | 0.002 |
| +13/2 | 0.003 | 0.004 | 0.003 | 0.005 | 0.007 | 0.002 | 0.003 | 0.003 |
| +15/2 | 0.002 | 0.000 | 0.000 | 0.003 | 0.000 | 0.001 | 0.001 | 0.000 |

Dy2

| M     | KD 1  |       | KD 2  |       | KD 3  |       | KD 4  |       |
|-------|-------|-------|-------|-------|-------|-------|-------|-------|
| -15/2 | 0.078 | 0.878 | 0.004 | 0.000 | 0.000 | 0.016 | 0.010 | 0.000 |
| -13/2 | 0.000 | 0.002 | 0.706 | 0.024 | 0.039 | 0.011 | 0.172 | 0.008 |
| -11/2 | 0.002 | 0.021 | 0.069 | 0.000 | 0.013 | 0.316 | 0.177 | 0.012 |
| -9/2  | 0.001 | 0.010 | 0.093 | 0.005 | 0.007 | 0.024 | 0.317 | 0.011 |
| -7/2  | 0.000 | 0.005 | 0.024 | 0.002 | 0.002 | 0.157 | 0.030 | 0.001 |
| -5/2  | 0.000 | 0.001 | 0.029 | 0.004 | 0.035 | 0.045 | 0.065 | 0.042 |
| -3/2  | 0.000 | 0.001 | 0.010 | 0.010 | 0.014 | 0.128 | 0.058 | 0.021 |
| -1/2  | 0.000 | 0.000 | 0.015 | 0.005 | 0.096 | 0.096 | 0.017 | 0.060 |
| +1/2  | 0.000 | 0.000 | 0.005 | 0.015 | 0.096 | 0.096 | 0.060 | 0.017 |
| +3/2  | 0.001 | 0.000 | 0.010 | 0.010 | 0.128 | 0.014 | 0.021 | 0.058 |
| +5/2  | 0.001 | 0.000 | 0.004 | 0.029 | 0.045 | 0.035 | 0.042 | 0.065 |
| +7/2  | 0.005 | 0.000 | 0.002 | 0.024 | 0.157 | 0.002 | 0.001 | 0.030 |
| +9/2  | 0.010 | 0.001 | 0.005 | 0.093 | 0.024 | 0.007 | 0.011 | 0.317 |
| +11/2 | 0.021 | 0.002 | 0.000 | 0.069 | 0.316 | 0.013 | 0.012 | 0.177 |
| +13/2 | 0.002 | 0.000 | 0.024 | 0.706 | 0.011 | 0.039 | 0.008 | 0.172 |
| +15/2 | 0.878 | 0.078 | 0.000 | 0.004 | 0.016 | 0.000 | 0.000 | 0.010 |

| M     | KD 5  |       | KD 6  |       | KD 7  |       | KD 8  |       |
|-------|-------|-------|-------|-------|-------|-------|-------|-------|
| -15/2 | 0.002 | 0.002 | 0.004 | 0.000 | 0.000 | 0.003 | 0.001 | 0.000 |
| -13/2 | 0.003 | 0.007 | 0.000 | 0.008 | 0.001 | 0.011 | 0.000 | 0.008 |
| -11/2 | 0.176 | 0.036 | 0.064 | 0.033 | 0.019 | 0.025 | 0.026 | 0.010 |
| -9/2  | 0.018 | 0.075 | 0.083 | 0.014 | 0.090 | 0.126 | 0.043 | 0.082 |
| -7/2  | 0.254 | 0.039 | 0.040 | 0.115 | 0.092 | 0.060 | 0.105 | 0.076 |
| -5/2  | 0.202 | 0.019 | 0.087 | 0.044 | 0.067 | 0.181 | 0.107 | 0.072 |
| -3/2  | 0.100 | 0.045 | 0.168 | 0.070 | 0.028 | 0.120 | 0.044 | 0.185 |
| -1/2  | 0.003 | 0.021 | 0.167 | 0.103 | 0.137 | 0.041 | 0.232 | 0.007 |
| +1/2  | 0.021 | 0.003 | 0.103 | 0.167 | 0.041 | 0.137 | 0.007 | 0.232 |
| +3/2  | 0.045 | 0.100 | 0.070 | 0.168 | 0.120 | 0.028 | 0.185 | 0.044 |
| +5/2  | 0.019 | 0.202 | 0.044 | 0.087 | 0.181 | 0.067 | 0.072 | 0.107 |
| +7/2  | 0.039 | 0.254 | 0.115 | 0.040 | 0.060 | 0.092 | 0.076 | 0.105 |

|       |       |       |       |       |       |       |       |       |
|-------|-------|-------|-------|-------|-------|-------|-------|-------|
| +9/2  | 0.075 | 0.018 | 0.014 | 0.083 | 0.126 | 0.090 | 0.082 | 0.043 |
| +11/2 | 0.036 | 0.176 | 0.033 | 0.064 | 0.025 | 0.019 | 0.010 | 0.026 |
| +13/2 | 0.007 | 0.003 | 0.008 | 0.000 | 0.011 | 0.001 | 0.008 | 0.000 |
| +15/2 | 0.002 | 0.002 | 0.000 | 0.004 | 0.003 | 0.000 | 0.000 | 0.001 |

---

## References

1. N. Iwahara and L. F. Chibotaru, *Phys. Rev. B*, 2015, **91**, 174438.
2. N. Iwahara, L. Ungur and L. F. Chibotaru, *Phys. Rev. B*, 2018, **98**, 054436.
